# Supplementary material for: Photosensitive damage of dipeptides: mechanism and influence of structure
Source: Royal Society of Chemistry journal article supplement (doi:10.1039/d2cp05047a), 2023-01-01
Supplement: d2cp05047a1.pdf [file d2cp05047a1.pdf]

## Support information

# Photosensitive Damage of Dipeptides: Mechanism and Influence of Structure

Cheng Yang<sup>a</sup>, Kai Yi<sup>a</sup>, Meirou Zhu<sup>a</sup>, Jiangxue Yang<sup>a</sup>, Yaxiong Wei<sup>\*a</sup>, Yongjia Shang<sup>b</sup>, Xinsheng Xu<sup>\*a</sup>

†

<sup>a</sup> Anhui Province Key Laboratory of Optoelectric Materials Science and Technology, School of Physics and Electronic Information, Anhui Normal University, Wuhu 241002, China. E-mails: davidl@mail.ustc.edu.cn; xxsheng@mail.ahnu.edu.cn

<sup>b</sup> Key Laboratory of Functional Molecular Solids, Ministry of Education, Anhui Laboratory of Molecule-Based Materials, College of Chemistry and Materials Science, Anhui Normal University, Wuhu 241000, China

# Contents

Figures and Tables.....3

DFT Calculation results.....6

## Figures and Tables

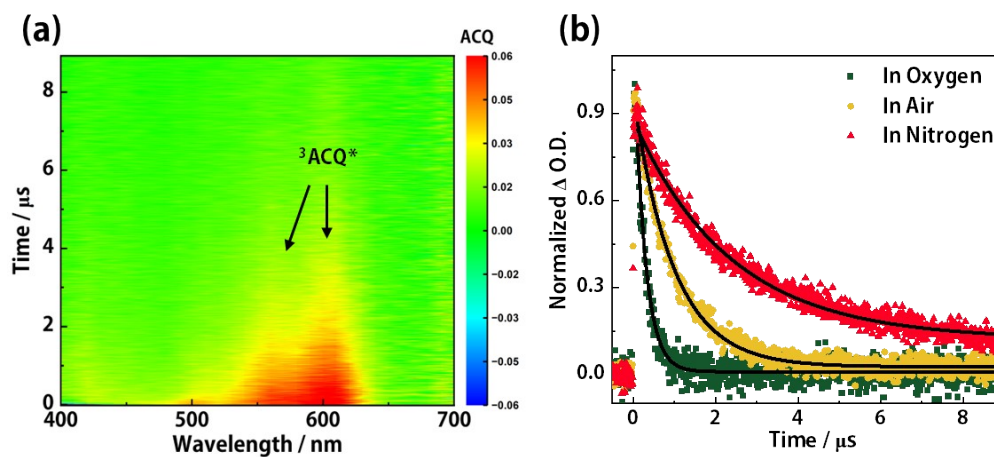

**Figure S1.** (a) Transient absorption spectra of ACQ in  $N_2$ -saturated ACN- $H_2O$  solution under photoexcitation at 355 nm. (b) The kinetic decay curves at 610 nm with Oxygen, Air and Nitrogen.

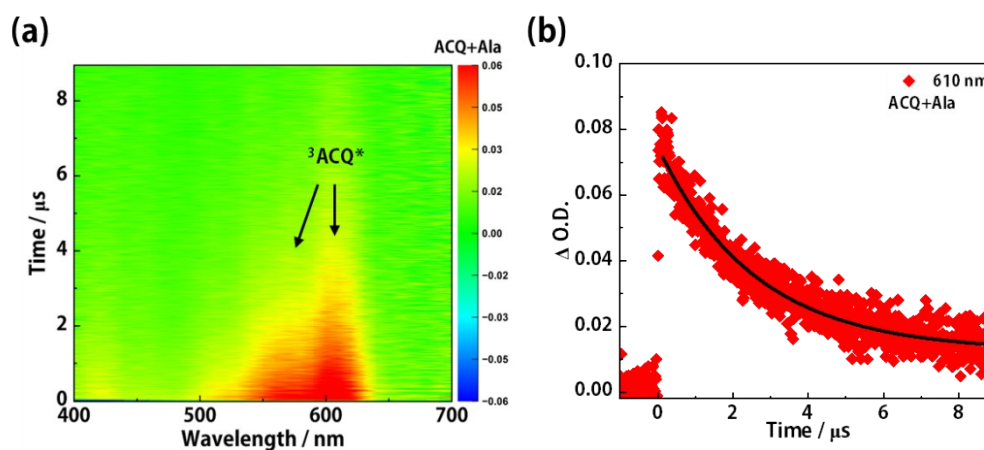

**Figure S2.** Transient absorption spectra (a) and kinetic decay curve (b) of ACQ+Ala measured in  $N_2$ -saturated ACN- $H_2O$  (1:1, v/v) solution under photoexcitation at 355 nm,  $c[ACQ] = 1.0$  mM,  $c[Ala] = 1.0$  mM.

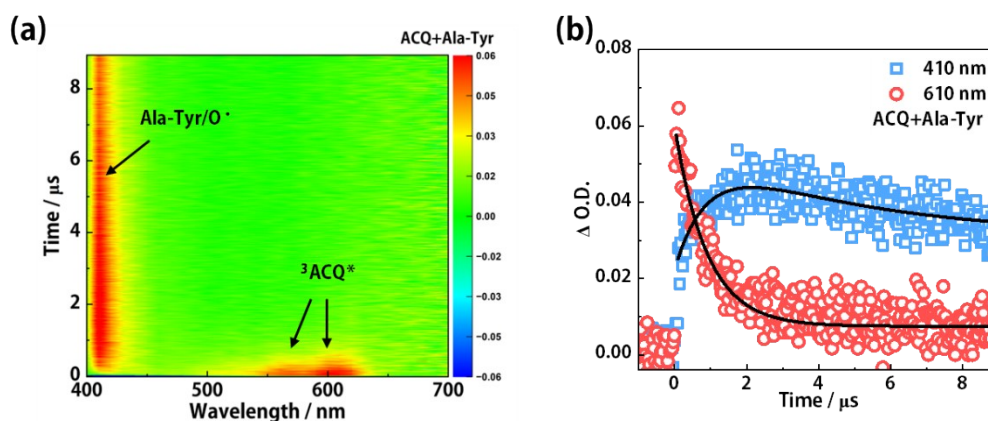

**Figure S3.** Transient absorption spectra (a) and kinetic decay curves (b) of ACQ+Ala-Tyr measured in  $N_2$ -saturated ACN- $H_2O$  (1:1, v/v) solution under photoexcitation at 355 nm,  $c[ACQ] = 1.0$  mM,  $c[Ala-Tyr] = 1.0$  mM

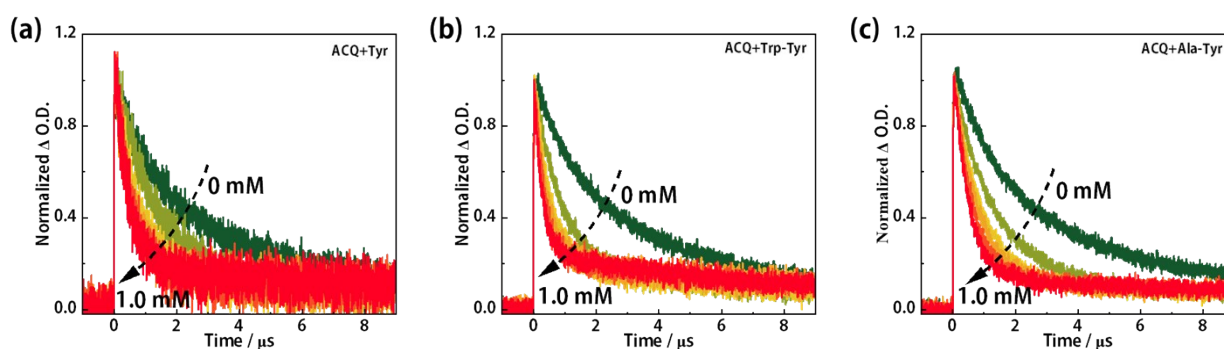

**Figure S4.** Kinetic decay curves of  $^3ACQ^*$  measured at 610 nm with different concentrations of Tyr (a), Trp-Tyr (b), Ala-Tyr (c),  $c[ACQ] = 1.0$  mM.

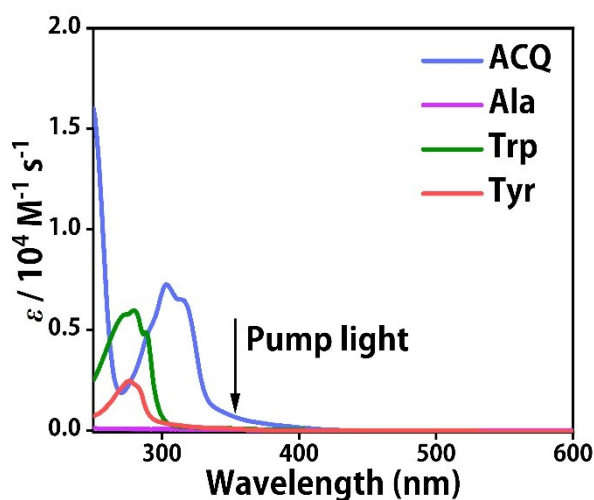

**Figure S5.** The steady-state UV-visible absorption spectra of ACQ, Ala, Trp, Tyr measured in ACN- $H_2O$  (1:1, v/v) solution.

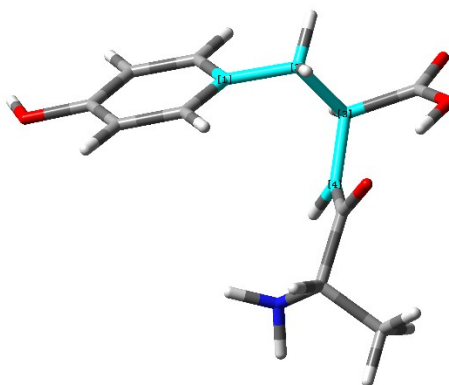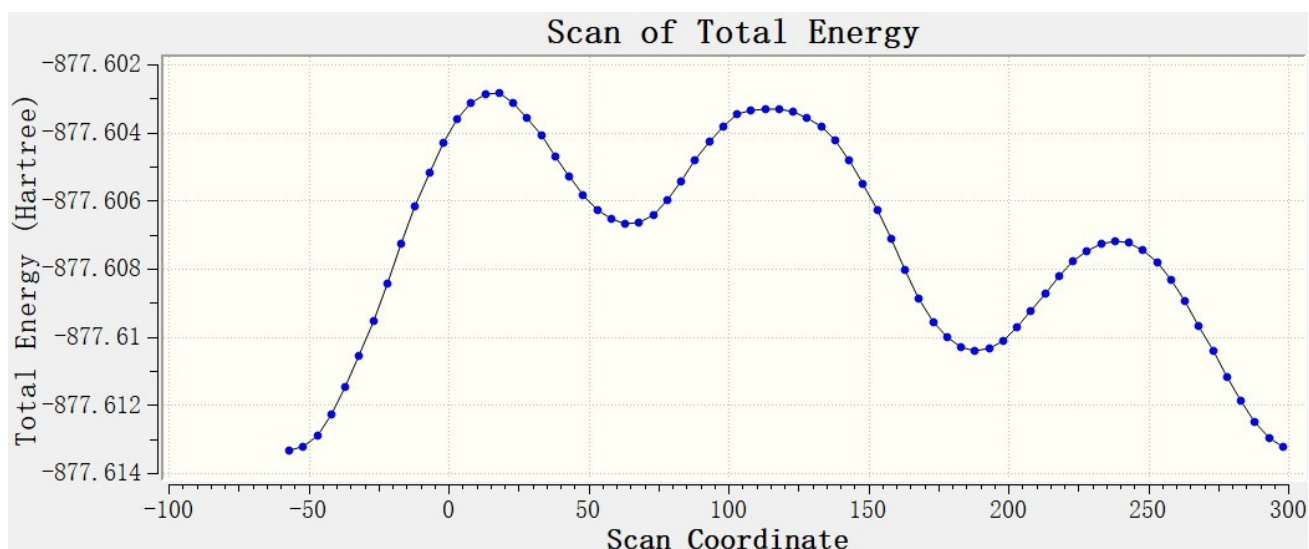

**Figure S6.** Scan of total energy of Ala-Tyr with the dihedral angle (carbon atom 1, 2, 3, 4).

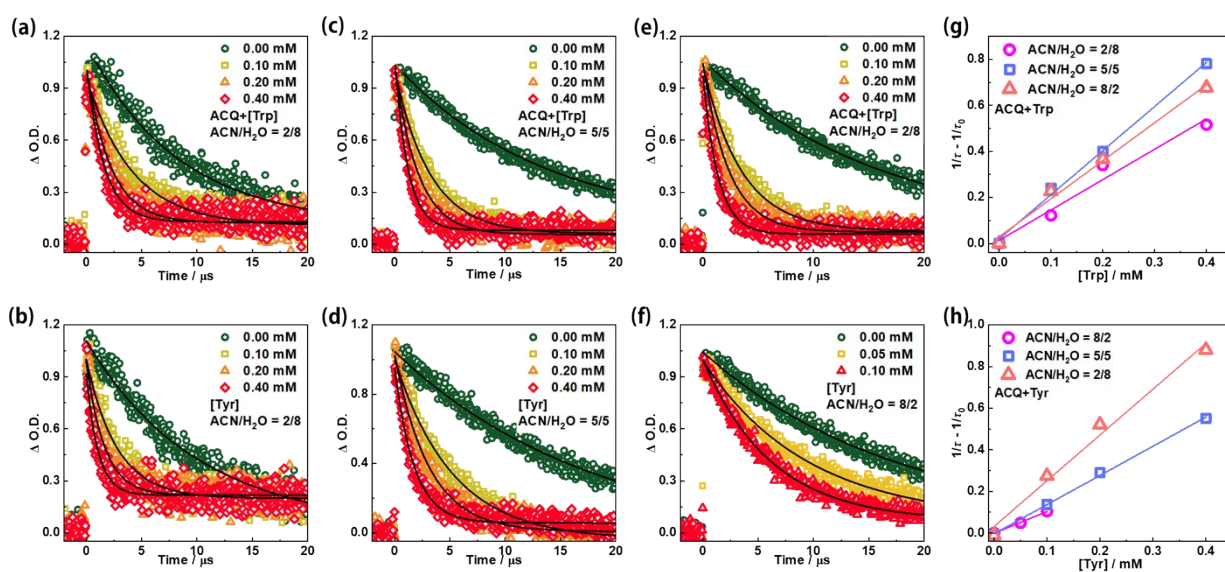

**Figure S7.** Transient absorption spectra (a-f) and kinetic decay curves (g-h) of ACQ+Trp (or Tyr) measured in  $N_2$ -saturated ACN- $H_2O$  solution under photoexcitation at 355 nm,  $c[ACQ] = 1.0$  mM.

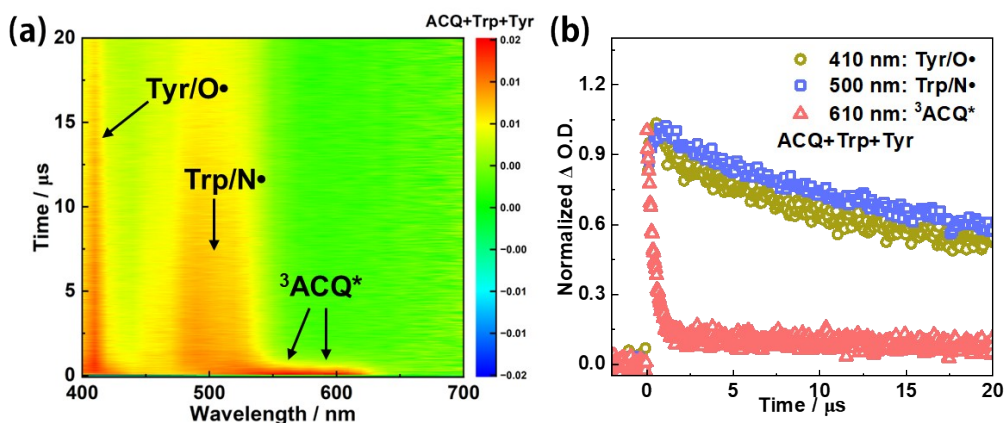

**Figure S8.** Transient absorption spectra (a) and kinetic decay curves (b) of ACQ+Trp+Tyr measured in  $N_2$ -saturated ACN- $H_2O$  (1:1, v/v) solution under photoexcitation at 355 nm,  $c[ACQ] = 1.0$  mM,  $c[Trp] = 0.5$  mM,  $c[Tyr] = 0.5$  mM.

**Table S1.** Summary of bimolecular quenching rate.

| Amino acid | $k_q / 10^9 \text{ M}^{-1} \text{ s}^{-1}$ |
|------------|--------------------------------------------|
| Tyr        | $1.55 \pm 0.08$                            |
| Trp        | $2.11 \pm 0.12$                            |
| Trp-Tyr    | $3.65 \pm 0.06$                            |
| Ala-Tyr    | $0.83 \pm 0.03$                            |
| Tyr-Ala    | $1.41 \pm 0.04$                            |

**Table S2.** Summary of bimolecular quenching rate in different solvents.

| [ACN] (%) | $\eta$ (mpa s) <sup>1,2</sup> | $\epsilon$ (F/m) <sup>1,2</sup> | $k_{\text{diffuse}}^a$ | $k_q^a$ |         | $k_q / k_{\text{diffuse}}$ |         |
|-----------|-------------------------------|---------------------------------|------------------------|---------|---------|----------------------------|---------|
|           |                               |                                 |                        | ACQ+Tyr | ACQ+Trp | ACQ+Tyr                    | ACQ+Trp |
| 20        | 0.87                          | 70                              | 7.5                    | 2.2     | 1.4     | 0.29                       | 0.19    |
| 50        | 0.56                          | 57                              | 11.6                   | 1.4     | 1.9     | 0.12                       | 0.17    |
| 80        | 0.38                          | 44                              | 17.1                   | 1.0     | 1.7     | 0.06                       | 0.10    |

<sup>a</sup> bimolecular quenching rate,  $10^9 \text{ M}^{-1} \text{ s}^{-1}$ ,  $k_{\text{diffuse}} = 8k_B T / (3\eta)$ .

## DFT Calculation results

### The optimal ground state structures of Trp

0 1

|   |             |             |             |
|---|-------------|-------------|-------------|
| C | 4.13061000  | -0.97179600 | -0.17752000 |
| C | 3.81439800  | 0.37589000  | -0.28258700 |
| C | 2.48065800  | 0.74452200  | -0.09196700 |
| C | 1.46317300  | -0.20421100 | 0.19863000  |
| C | 1.81672400  | -1.56042700 | 0.29908900  |
| C | 3.14026000  | -1.93095900 | 0.11089700  |
| N | 1.87718800  | 1.98292800  | -0.13354900 |
| C | 0.52464700  | 1.84505700  | 0.11891800  |
| C | 0.22267600  | 0.52259300  | 0.32750000  |
| C | -1.11773200 | -0.07995100 | 0.64371800  |
| C | -2.24833500 | 0.32400500  | -0.33803400 |
| C | -3.43720600 | -0.61774900 | -0.13368700 |
| N | -2.60395400 | 1.72745900  | -0.16697800 |
| O | -3.22884900 | -1.83099100 | -0.70040200 |
| O | -4.44446700 | -0.34845000 | 0.47298100  |
| H | 5.15679200  | -1.29123400 | -0.31914800 |
| H | 4.57806600  | 1.11369400  | -0.50418300 |
| H | 1.06763700  | -2.31288700 | 0.52093000  |
| H | 3.42095800  | -2.97539900 | 0.18628200  |
| H | 2.34173300  | 2.85359800  | -0.32819600 |
| H | -0.13443700 | 2.69722900  | 0.11815200  |
| H | -1.02413600 | -1.16829200 | 0.63489400  |
| H | -1.44354700 | 0.19250400  | 1.65563100  |
| H | -1.87971700 | 0.17518300  | -1.35620400 |
| H | -3.20697400 | 2.03767900  | -0.92243700 |
| H | -3.13959500 | 1.84031500  | 0.69020300  |
| H | -4.00214000 | -2.38141800 | -0.50261000 |

### The optimal ground state structures of Tyr

0 1

|   |             |             |             |
|---|-------------|-------------|-------------|
| C | -2.64108500 | -1.12990600 | 0.17628300  |
| C | -3.31836500 | 0.05300900  | -0.12211300 |
| C | -2.62983200 | 1.26513000  | -0.11493300 |
| C | -1.26952500 | 1.28531900  | 0.19042700  |
| C | -0.57191000 | 0.11244500  | 0.48999600  |
| C | -1.28476700 | -1.09390200 | 0.47688800  |
| O | -4.65584400 | -0.03816900 | -0.40914900 |
| C | 0.90599700  | 0.16094900  | 0.80210800  |
| C | 1.80907900  | -0.26132600 | -0.39372500 |
| C | 3.23434900  | 0.22392000  | -0.12380000 |
| O | 3.37463000  | 1.55153300  | -0.35953900 |
| O | 4.14066600  | -0.46399600 | 0.27628800  |
| N | 1.73248600  | -1.69703800 | -0.61746100 |
| H | -3.18842700 | -2.06488200 | 0.16920200  |
| H | -3.15093000 | 2.19124700  | -0.34050600 |
| H | -0.74779700 | 2.23732800  | 0.19838400  |
| H | -0.76448500 | -2.01901300 | 0.69180500  |

|   |             |             |             |
|---|-------------|-------------|-------------|
| H | -5.00924400 | 0.83923700  | -0.58837700 |
| H | 1.17502300  | 1.17623000  | 1.10410600  |
| H | 1.14424300  | -0.49701900 | 1.64472600  |
| H | 1.44820000  | 0.25662500  | -1.28589800 |
| H | 4.28611000  | 1.79259900  | -0.13300000 |
| H | 2.07832300  | -1.93993800 | -1.53959000 |
| H | 2.32233400  | -2.18191000 | 0.05377400  |

### The optimal ground state structures of Trp-Tyr

0 1

|   |             |             |             |
|---|-------------|-------------|-------------|
| C | 5.74694600  | 1.63036100  | -1.13431800 |
| C | 6.80455200  | 1.31008700  | -0.28119400 |
| C | 6.54981000  | 0.65329400  | 0.92167600  |
| C | 5.24067800  | 0.31486900  | 1.26183800  |
| C | 4.16977700  | 0.62098500  | 0.42081900  |
| C | 4.44832800  | 1.28897300  | -0.77943800 |
| O | 8.06586300  | 1.67107000  | -0.67626700 |
| C | 2.75084100  | 0.25563600  | 0.78540000  |
| C | 2.13275200  | -0.92554100 | -0.02974500 |
| N | 0.70862900  | -1.05058900 | 0.22858800  |
| C | 2.78383600  | -2.24864300 | 0.33155400  |
| O | 2.33922000  | -3.02893800 | 1.14130200  |
| O | 3.93300900  | -2.45276100 | -0.33384400 |
| C | -0.21284800 | -0.28331300 | -0.42660900 |
| C | -1.66728200 | -0.53122200 | 0.01170900  |
| C | -2.63205700 | -0.18853100 | -1.13751900 |
| O | 0.10832700  | 0.54066300  | -1.26781600 |
| N | -1.93067500 | 0.32087700  | 1.18061100  |
| C | -4.07871000 | -0.44002000 | -0.81587300 |
| C | -5.02054600 | 0.47723800  | -0.21516100 |
| C | -6.26537200 | -0.20064700 | -0.11145000 |
| N | -6.08205400 | -1.46764500 | -0.62324600 |
| C | -4.77270700 | -1.60054500 | -1.04908500 |
| C | -4.93723200 | 1.80957900  | 0.22734200  |
| C | -6.06837600 | 2.41614300  | 0.75308800  |
| C | -7.29018300 | 1.72148200  | 0.85086800  |
| C | -7.40557800 | 0.40697000  | 0.42063400  |
| H | 5.95729000  | 2.15024400  | -2.06115600 |
| H | 7.36736600  | 0.41030300  | 1.59443600  |
| H | 5.05669400  | -0.19185500 | 2.20403500  |
| H | 3.63275500  | 1.55385900  | -1.44507700 |
| H | 8.70358100  | 1.41398000  | -0.00237600 |
| H | 2.67808400  | 0.01290300  | 1.84960900  |
| H | 2.08911000  | 1.10525400  | 0.60078600  |
| H | 2.27979300  | -0.72739100 | -1.09273900 |
| H | 0.42081000  | -1.77804900 | 0.86822700  |
| H | 4.31435100  | -3.28557900 | -0.01470600 |
| H | -1.77846600 | -1.60511000 | 0.24036700  |
| H | -2.34179100 | -0.78242800 | -2.00897600 |
| H | -2.47152100 | 0.85685000  | -1.40917400 |
| H | -2.90189300 | 0.23378200  | 1.46496400  |
| H | -1.35618200 | 0.05054800  | 1.97219100  |
| H | -6.79528400 | -2.17130200 | -0.71226100 |



|   |             |             |             |
|---|-------------|-------------|-------------|
| H | -4.43691600 | -2.52078000 | -1.50302900 |
| H | -4.00067000 | 2.35142000  | 0.16344200  |
| H | -6.01506100 | 3.44330800  | 1.09558900  |
| H | -8.15637700 | 2.22330400  | 1.26698700  |
| H | -8.34810700 | -0.12495800 | 0.49297200  |

### The optimal ground state structures of Tyr-Ala

0 1

|   |             |             |             |
|---|-------------|-------------|-------------|
| C | 4.50996100  | 0.82323300  | -0.16884600 |
| C | 4.92418500  | -0.49288300 | -0.37797900 |
| C | 4.04578800  | -1.54324200 | -0.11831300 |
| C | 2.75980900  | -1.26893000 | 0.34716800  |
| C | 2.32300100  | 0.04082800  | 0.56091000  |
| C | 3.22547600  | 1.08056700  | 0.29460600  |
| O | 6.20260900  | -0.68988700 | -0.83328100 |
| C | 0.91890600  | 0.30943000  | 1.05269400  |
| C | -0.04184200 | 0.85297900  | -0.04093100 |
| C | -1.49095000 | 0.68665200  | 0.45130000  |
| N | 0.27566400  | 2.24441000  | -0.34928400 |
| N | -2.12196100 | -0.46460200 | 0.06548600  |
| C | -3.50368500 | -0.74149600 | 0.41174200  |
| C | -4.52680700 | -0.13072700 | -0.55162400 |
| O | -2.01862100 | 1.51419800  | 1.17874200  |
| C | -3.75307000 | -2.25160000 | 0.53274600  |
| O | -5.70296600 | -0.05244100 | -0.30790600 |
| O | -3.98803600 | 0.27737400  | -1.72371300 |
| H | 5.20378900  | 1.63047400  | -0.37114000 |
| H | 4.36237700  | -2.57121600 | -0.27090000 |
| H | 2.09105100  | -2.09889300 | 0.55471200  |
| H | 2.90715900  | 2.10519600  | 0.43893900  |
| H | 6.37242700  | -1.63312900 | -0.92400900 |
| H | 0.50268700  | -0.61644000 | 1.46136200  |
| H | 0.92476700  | 1.03582600  | 1.87179800  |
| H | 0.10489800  | 0.26065700  | -0.95042900 |
| H | -0.16372300 | 2.52712200  | -1.21964300 |
| H | -0.11823900 | 2.83503200  | 0.38030900  |
| H | -1.69850500 | -1.01738300 | -0.66486500 |
| H | -3.69530400 | -0.25951000 | 1.37192900  |
| H | -4.79389600 | -2.43963300 | 0.79767300  |
| H | -3.10911000 | -2.67059700 | 1.30780900  |
| H | -3.54147000 | -2.76494600 | -0.41045600 |
| H | -4.71334200 | 0.63596900  | -2.25808000 |

### The optimal ground state structures of Ala-Tyr

0 1

|   |            |             |             |
|---|------------|-------------|-------------|
| C | 2.99405600 | 0.69653300  | 0.99818100  |
| C | 3.85040600 | 0.21978100  | 0.00611700  |
| C | 3.46828700 | -0.87581900 | -0.77004600 |
| C | 2.23270800 | -1.48128400 | -0.55450200 |
| C | 1.35473600 | -1.01405700 | 0.42855300  |
| C | 1.76245500 | 0.08057700  | 1.19995800  |

|   |             |             |             |
|---|-------------|-------------|-------------|
| O | 5.04978800  | 0.86022900  | -0.15538500 |
| C | 0.00192200  | -1.65516500 | 0.63726300  |
| C | -1.02285600 | -1.28602300 | -0.47217100 |
| N | -1.21978800 | 0.16205100  | -0.61115600 |
| C | -2.32230500 | -2.10337900 | -0.28559800 |
| O | -2.51446900 | -3.09675700 | -0.94081100 |
| O | -3.17220200 | -1.69884900 | 0.65871300  |
| C | -1.67858800 | 1.00314200  | 0.32973700  |
| C | -1.59913700 | 2.49649300  | -0.01636300 |
| C | -3.00265400 | 3.00720900  | -0.36437100 |
| O | -2.17487200 | 0.63824700  | 1.40406300  |
| N | -0.67410800 | 2.72856600  | -1.13328900 |
| H | 3.30942500  | 1.53529000  | 1.60737300  |
| H | 4.13616400  | -1.26088200 | -1.53524800 |
| H | 1.95690300  | -2.33871400 | -1.16085500 |
| H | 1.11019800  | 0.45105700  | 1.98434600  |
| H | 5.56497400  | 0.42230300  | -0.84096200 |
| H | 0.09111000  | -2.74560600 | 0.63362600  |
| H | -0.39974400 | -1.36806900 | 1.61066700  |
| H | -0.62692300 | -1.61983800 | -1.43019600 |
| H | -0.82993900 | 0.62918100  | -1.42378200 |
| H | -2.85403100 | -0.86665300 | 1.09641400  |
| H | -1.27552900 | 2.98341000  | 0.91204600  |
| H | -3.70315500 | 2.76071500  | 0.43385900  |
| H | -3.35781100 | 2.55544300  | -1.29468500 |
| H | -2.98999200 | 4.09373100  | -0.48736600 |
| H | 0.28754900  | 2.80134100  | -0.81720600 |
| H | -0.90206400 | 3.58196000  | -1.63009400 |

## Reference

1. H. Wode, W. Seidel, *Berichte der Bunsengesellschaft für physikalische Chemie*, 1994, **98**, 927.
2. A. M. Katti, N. E. Tarfulea, C. J. Hopper, K. R. Kmiotek, *Journal of Chemical Engineering Data*, 2008, **53**, 2865.
